# Supplementary material for: Disruption of the BCL11A Erythroid Enhancer Reactivates Fetal Hemoglobin in Erythroid Cells of Patients with β-Thalassemia Major
Source: PubMed Central journal article supplement — Mol Ther Methods Clin Dev. 2018 Aug 14;10:313–26. doi: 10.1016/j.omtm.2018.08.003 (PMC6120587; doi:10.1016/j.omtm.2018.08.003), 2018-08-14
Supplement: mmc1.pdf [file mmc1.pdf]

**OMTM, Volume 10**

**Supplemental Information**

**Disruption of the BCL11A Erythroid Enhancer  
Reactivates Fetal Hemoglobin in Erythroid Cells  
of Patients with  $\beta$ -Thalassemia Major**

**Nikoletta Psatha, Andreas Reik, Susan Phelps, Yuanyue Zhou, Demetri Dalas, Evangelia Yannaki, Dana N. Levasseur, Fyodor D. Urnov, Michael C. Holmes, and Thalia Papayannopoulou**

Chr.2

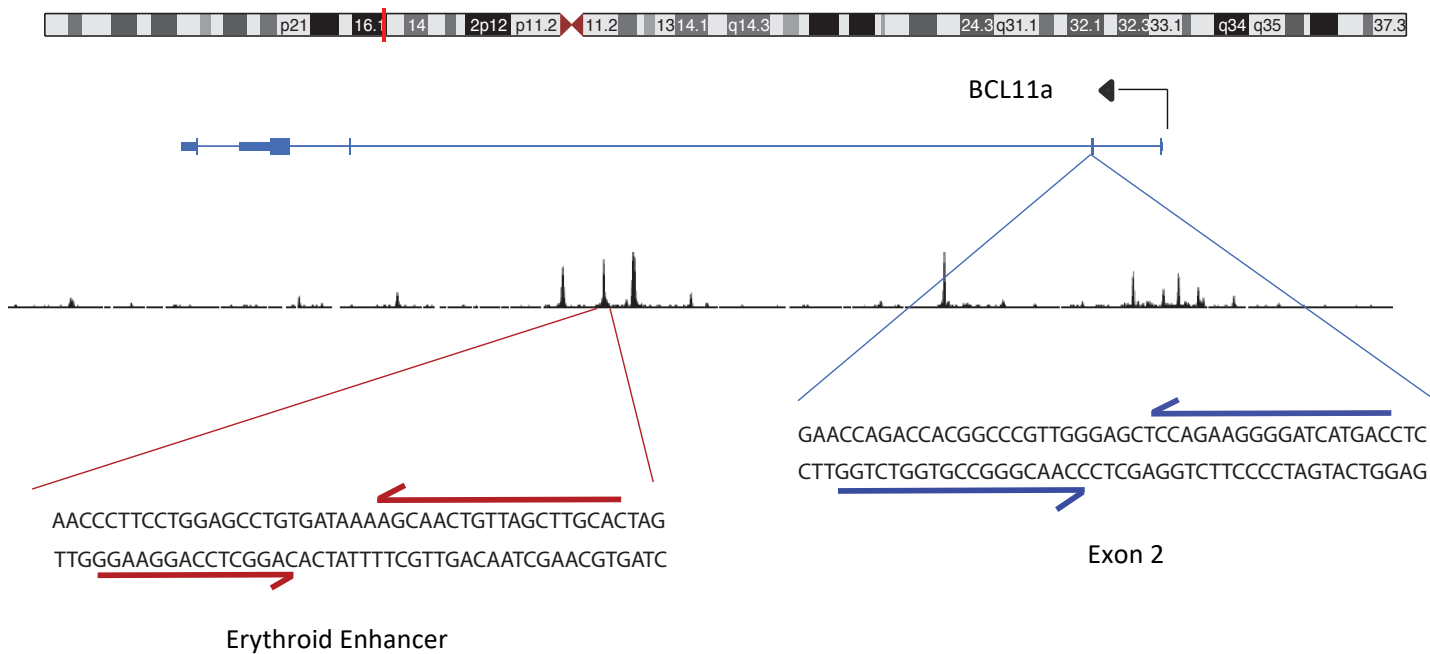

**Supp.Figure 1.** Binding sequences of the ZFNs targeting the BCL11a Exon 2 and the erythroid enhancer (DHS +58).

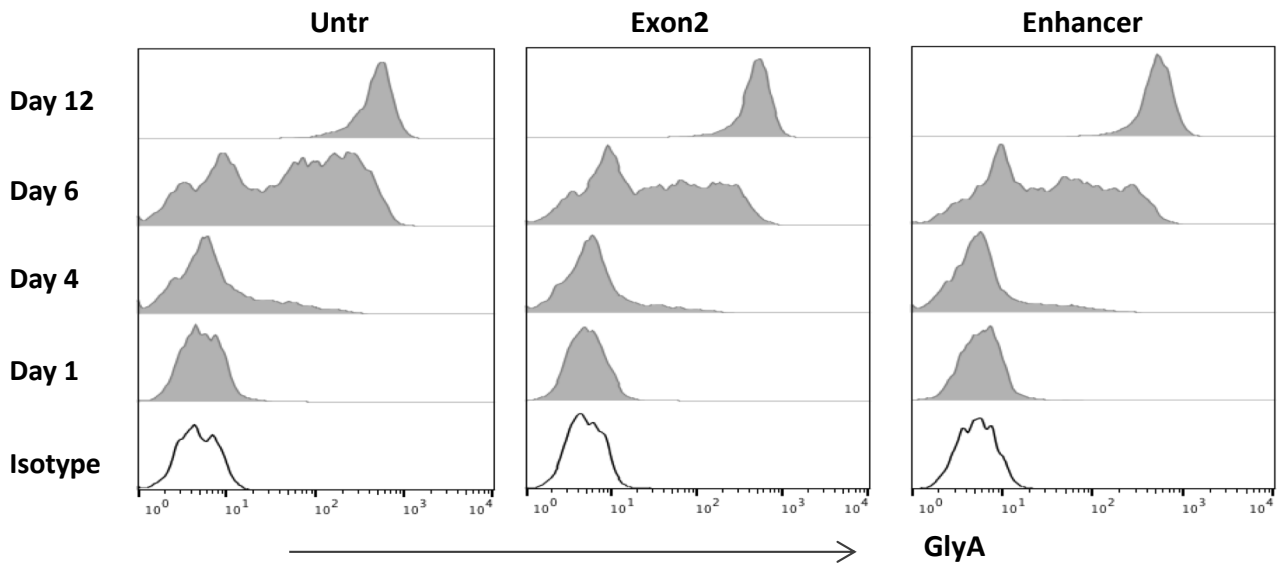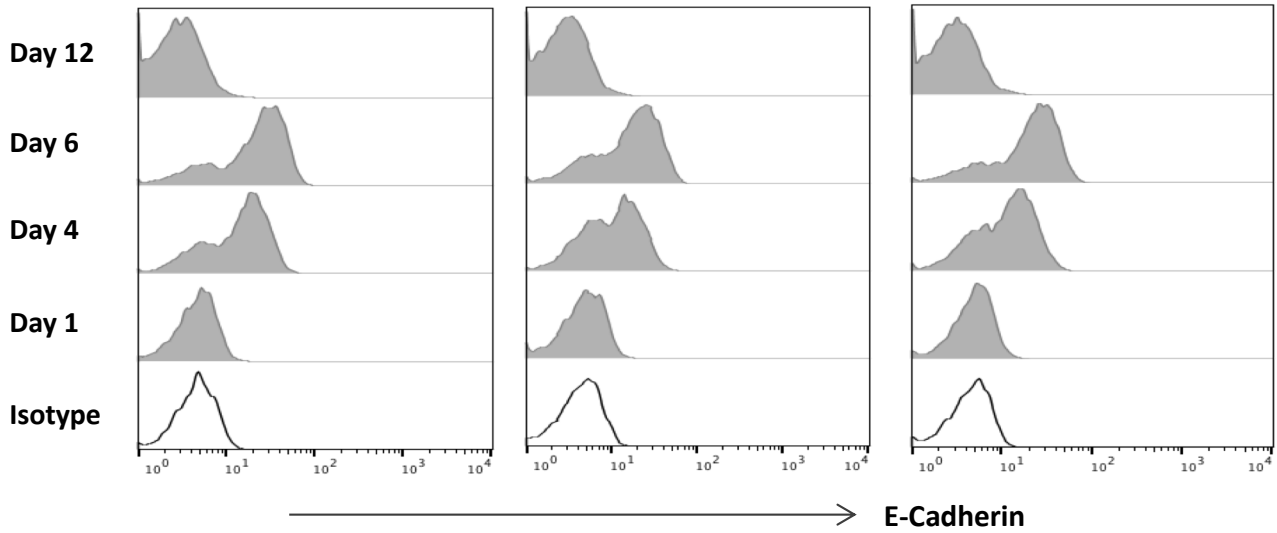

**Supp. Figure 2.** Concurrent erythroid differentiation of untransfected, exon2 and enhancer-ZFN transfected wild type cells based on early (E-cadherin) and late (GlyA) erythroid surface markers.

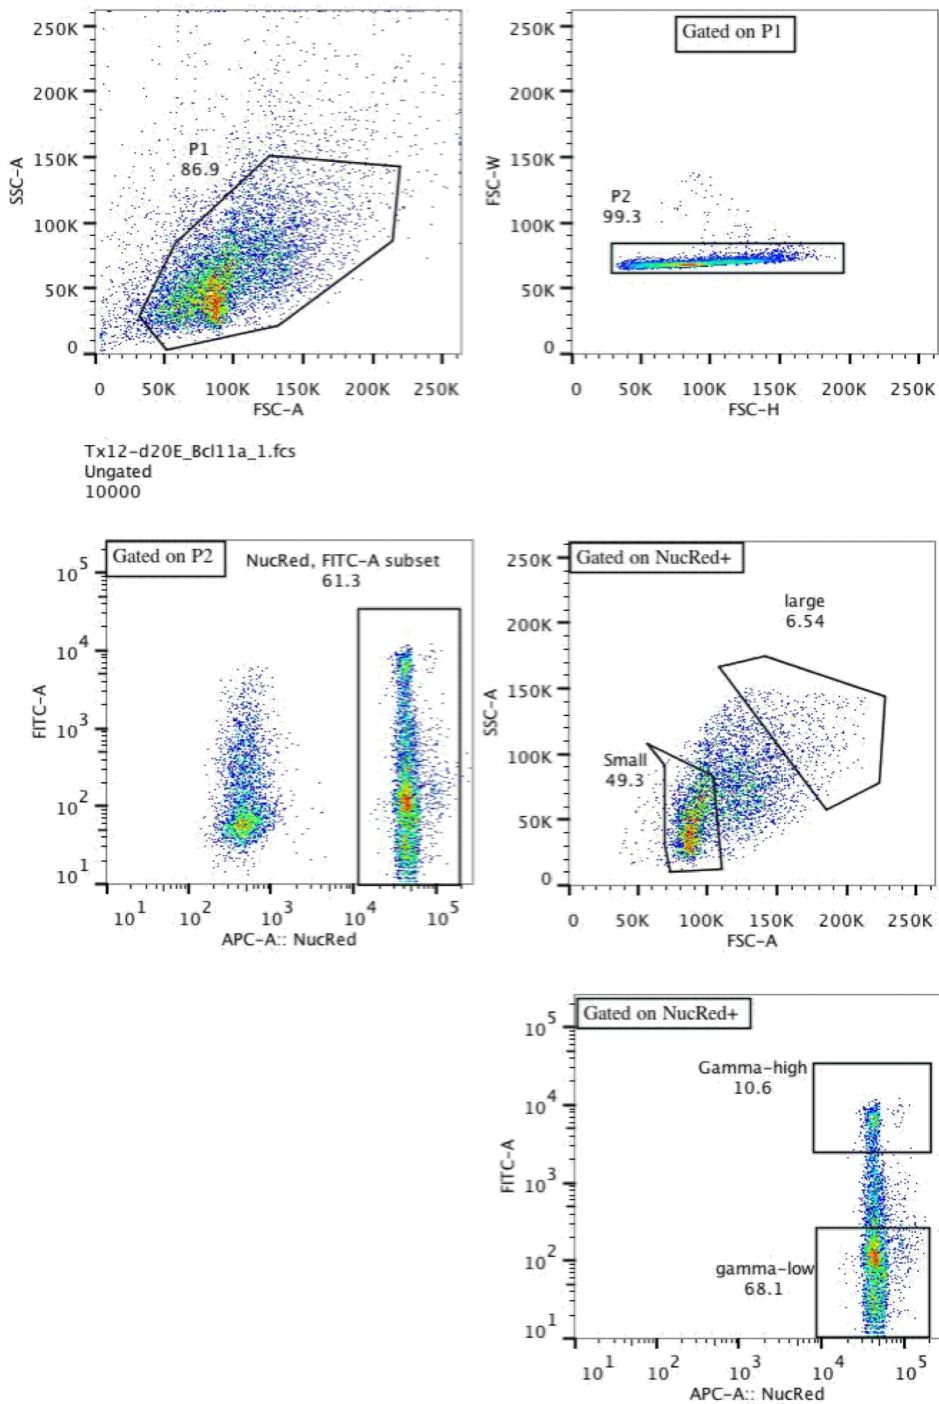

**Supp. Figure 3.** Gating strategy for sorting erythroid cells based on their size (small/large) and/or based on HbF expression (high/low). Representative dot plots from the exon2-edited sample.

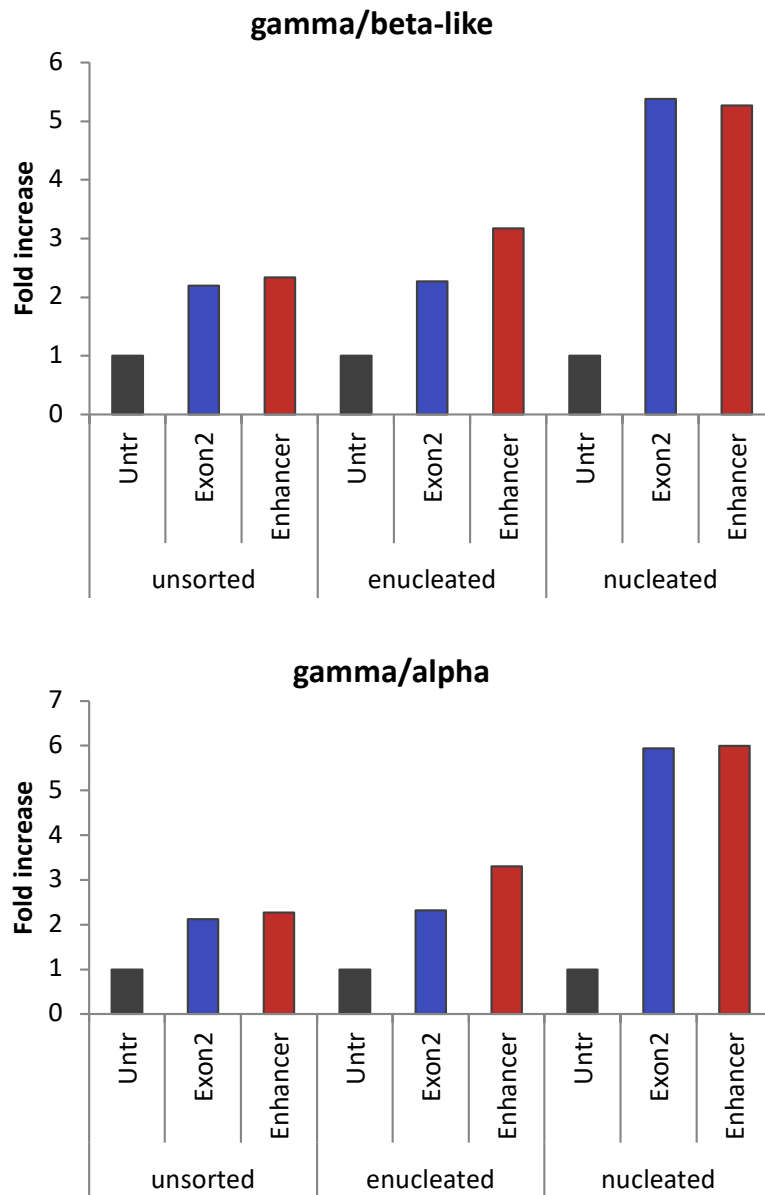

**Supp. Figure 4.** Gamma-globin/beta-like globin and gamma-globin/alpha-globin fold increase in normal cells after editing as evaluated by HPLC (day 20 of the erythroid differentiation).

## RT-PCR Day 14

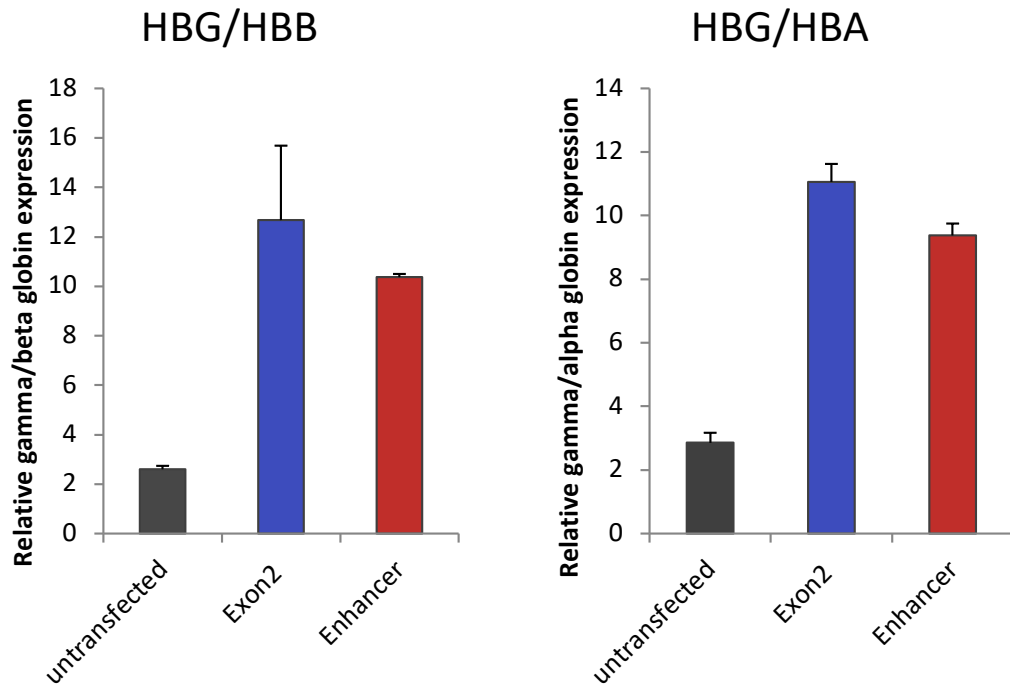

**Supp. Figure 5.** Relative gamma-globin/beta-globin and gamma-globin/alpha-globin ratios as evaluated by RT-PCR. Both  $\gamma$ -globin and  $\beta$ -globin were measured independently in replicate (each  $n = 2$ ) and then combinatorically normalized to each other (total  $n = 4$ ). Bars and error represent mean  $\pm$  s.d. of the normalized data.

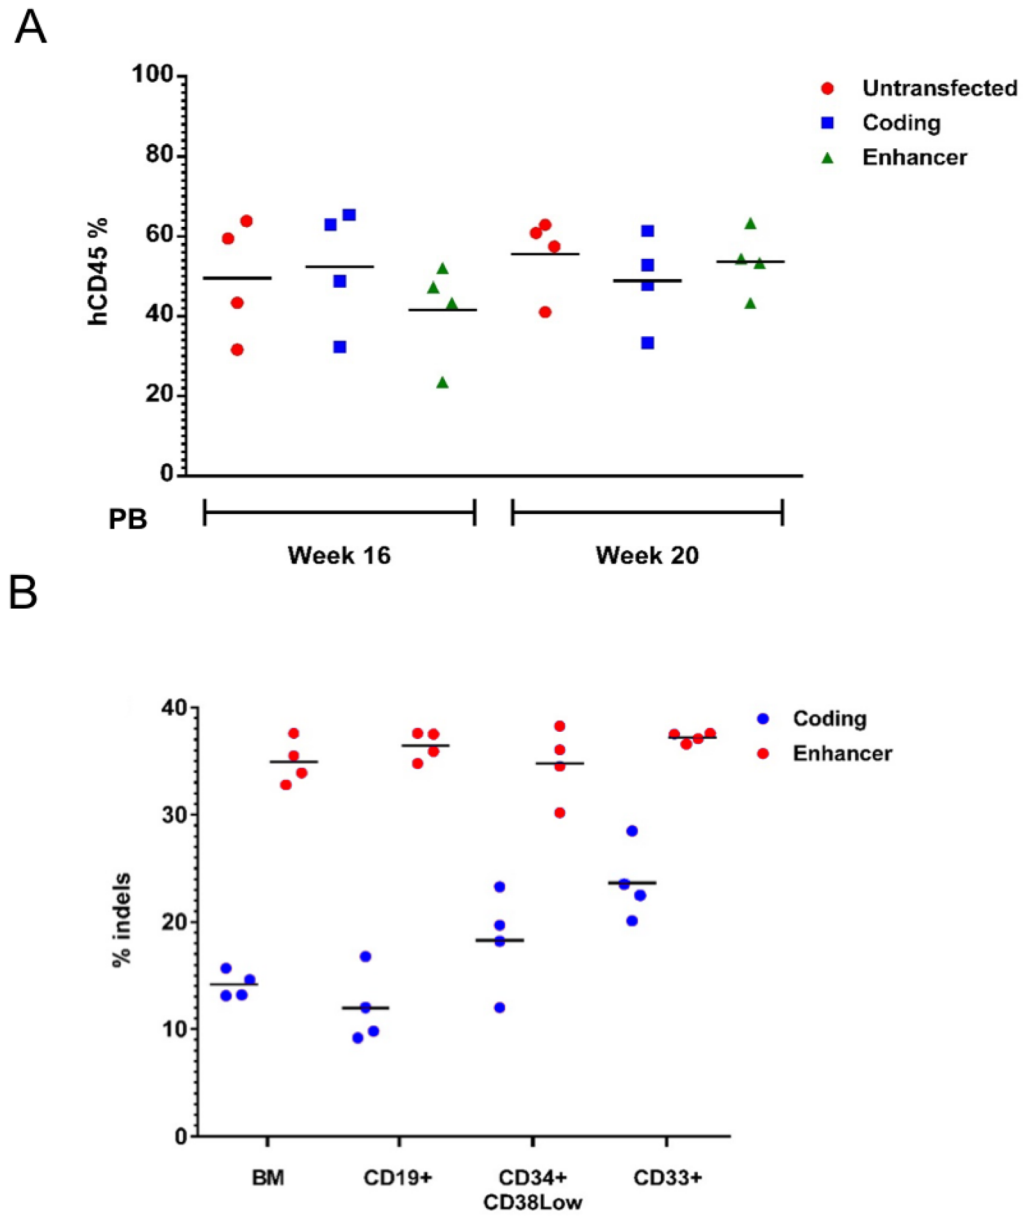

**Supp. Figure 6.** A. human cell chimerism in the BM of primary recipients 16 and 20 weeks post transplantation. B. Indel % in different lineages in the bone marrow of primary recipients 20 weeks post transplantation.

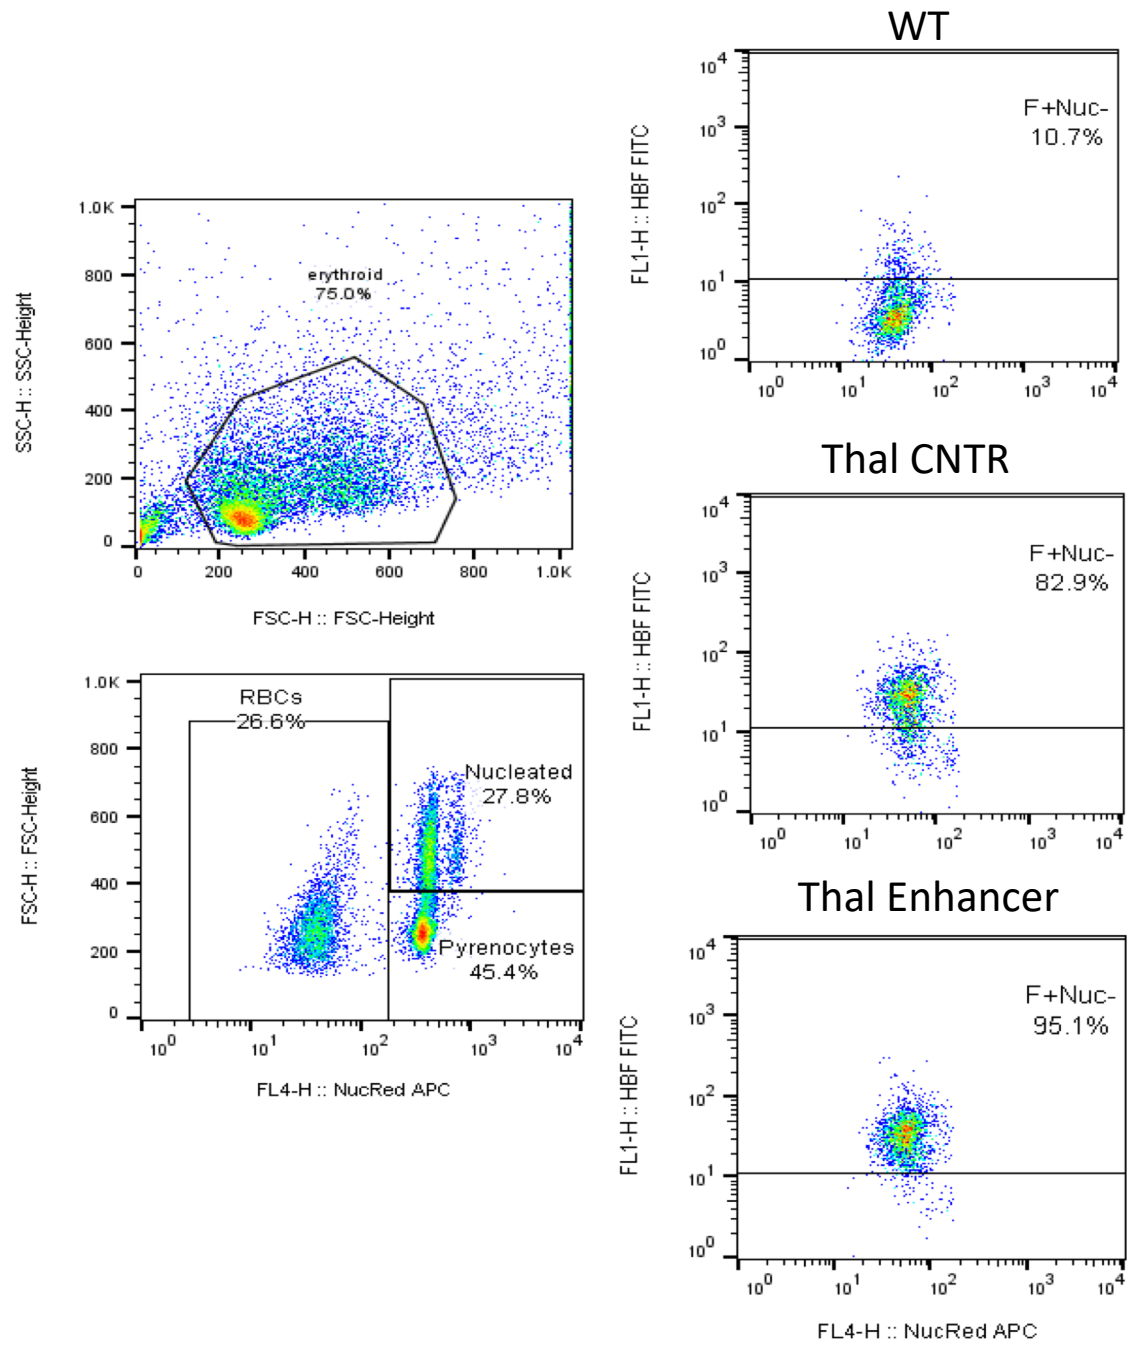

**Supp. Figure 7.** HbF+ cell frequency within the red blood cells of wild type and thalassemic ( $\beta^+/\beta^+$ : IVSII-745/IVSII-745) edited and unedited samples.



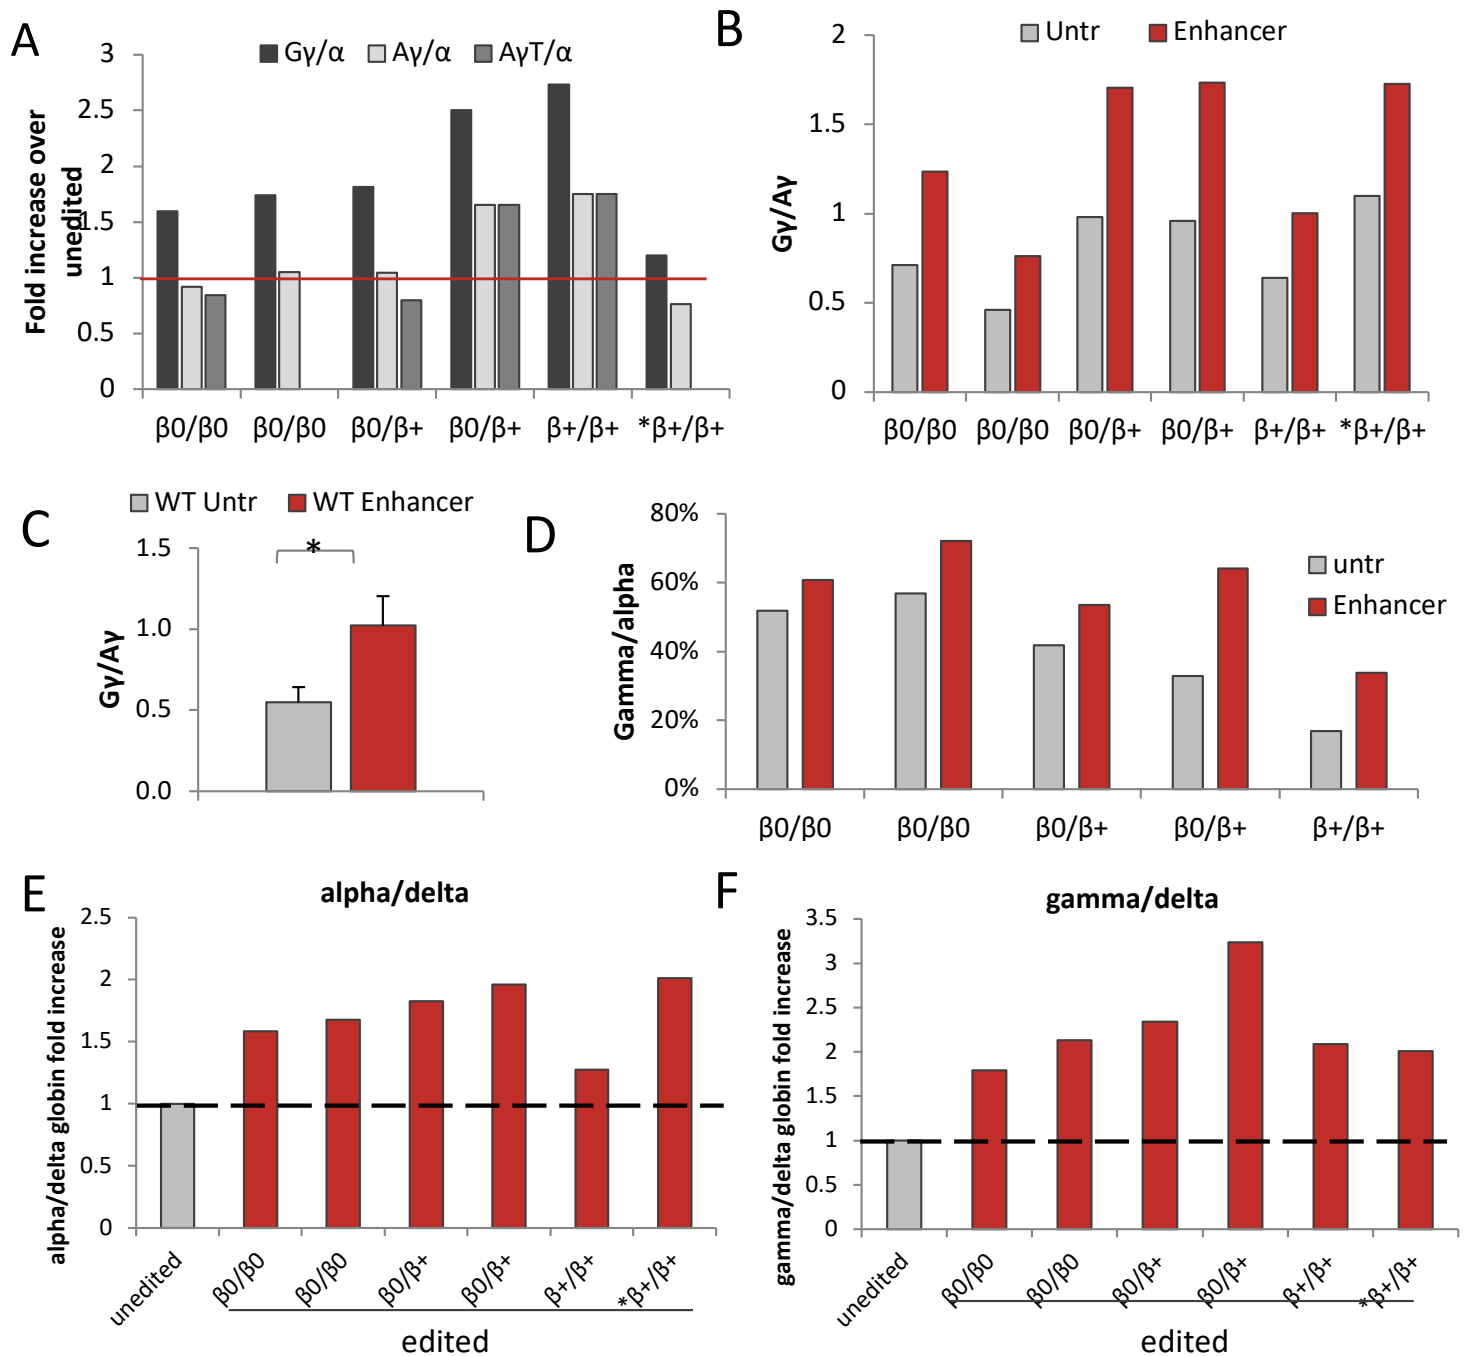

**Supp. Figure 8.** A. G-gamma, A-gamma and (in some donors) AT-gamma chains increase in thalassemic edited samples. B. Gy/Ay ratio in unedited and edited cells. C. Gy/Ay ratio in WT samples from three donors unedited and edited with the enhancer ZFNs. D. Gamma-globin/alpha-globin percentage. The \* $\beta^+/\beta^+$  sample (IVSII-745/IVSII-745) is excluded. E. The alpha-globin/delta-globin fold increase in all thalassemic edited samples. F. The gamma-globin/delta-globin fold increase in all thalassemic edited samples. All data were collected on day 20 of the erythroid culture. Genotype of samples from left to right in all panels: IVS1-1/IVS1-1, CD39/CD39, CD39/IVS1-110, CD39/IVS1-110, IVS1-110/IVS1-110, IVSII-745/IVSII-745.
